# Supplementary material for: Agathis vs. Hymenaea—trapping biases to interpret arthropod assemblages in ambers
Source: BMC Biol. 2025 Nov 7;23:337. doi: 10.1186/s12915-025-02453-y (PMC12593905; doi:10.1186/s12915-025-02453-y)
Supplement: Supplementary file 3 — Additional file 3. List of unbiased amber inclusions from various localities. [file 12915_2025_2453_MOESM3_ESM.xlsx]

## Sheet: abbreviations
Do	Dominican Republic
J.C	Mr. Jorge Caridad, family collection at the Museo Mundo del àmbar in Santo Dominigo, Dominican Republic
MX	Mexico
TZ	Tanzania
MG	Madagascar
H.v.	Hymenaea verrucosa
H.c.	Hymenaea courbaril
ST	Sticky trap
M	Malaise trap
coll.	collection
Poinar 1999	Poinar, G. O., & Poinar, R. (1999). The amber forest: a reconstruction of a vanished world. Princeton University Press.
*	Dominican amber collection from Wunderlich and Poinar cited in Penney 2002:
	Penney, D. (2002). Paleoecology of Dominican amber preservation: spider (Araneae) inclusions demonstrate a bias for active, trunk-dwelling faunas. Paleobiology, 28(3), 389-398.
*3 Coll.	Coll. Stuttgart (Germany), Berkeley (USA), Museo Tuxtla (Chiapas, Mexico)
m	meters
NC	New Caledonia
A.l.	Agathis lanceolata
Perrichot et al. 2007	Perrichot, V., Néraudeau, D., Nel, A., & De Ploeg, G. (2007). A reassessment of the Cretaceous amber deposits from France and their palaeontological significance. African invertebrates, 48(1), 213-227.

## Sheet: Cretaceous amber-Orders
		SPAIN (Albian)						FRANCE (Cenomanian)								CONGO (Aptian)
Phylum/Class/Orders	Subphylum	Spain: Peñacerrada	Spain: El Soplao	Spain: San Just	Spain: Ariño	Spain: La Hoya	Spain: Arroyo Pascueta	France: Archingeay-Les Nouillers	France: La Buzinie	France: Fouras	France: Cadeuil	France: Aix island	France: Fourtou	France: Renardières	France: Salignac	Congo: Doumanga
Acari	Chelicerata	130	21	19	5	0	0	50	61	21	2	0	1	0	2	5
Amphipoda indet.	"Crustacea"	3	0	0	0	0	0	0	0	0	0	0	0	0	0	0
Arachnida indet.	Chelicerata	0	0	0	3	0	0	2	0	0	0	0	0	0	0	1
Araneae	Chelicerata	82	41	26	7	0	0	32	1	3	2	1	1	0	0	1
Archaeognatha	Hexapoda	9	0	1	1	0	0	0	0	0	0	0	0	0	0	0
Chilopoda	Myriapoda	2	1	0	0	0	0	0	1	0	0	0	0	0	0	0
Coleoptera	Hexapoda	106	100	25	5	0	0	49	2	6	3	0	3	1	8	2
Collembola	Hexapoda	106	34	2	0	0	0	17	5	6	0	0	0	0	3	0
Dermaptera	Hexapoda	1	0	0	0	0	0	5	8	0	0	0	0	0	0	0
Diplopoda	Myriapoda	0	0	0	0	0	0	6	0	1	0	0	1	0	2	0
Diplostraca: Cladocera	"Crustacea"	0	0	0	0	0	0	0	0	0	1	0	0	0	0	0
Diplura	Hexapoda	0	0	1	0	0	0	0	0	0	0	0	0	0	0	0
Diptera	Hexapoda	1260	424	100	25	3	4	490	23	22	27	1	3	1	0	20
Dyctioptera: Blattaria	Hexapoda	79	25	15	1	3	1	48	3	1	5	0	3	0	3	0
Dyctioptera: Mantodea	Hexapoda	0	0	1	0	0	0	0	0	0	0	0	0	0	0	0
Dictyoptera: Termitoidea	Hexapoda	45	13	6	0	0	0	6	0	1	0	0	1	0	2	0
Dyctioptera indet.	Hexapoda	0	0	0	1	0	0	0	0	0	0	0	0	0	0	0
Embidiina	Hexapoda	0	0	0	0	0	0	0	0	0	0	0	0	0	0	0
Ephemeroptera	Hexapoda	0	0	0	0	0	0	0	0	0	0	0	0	0	0	0
Hemiptera	Hexapoda	95	12	30	3	0	0	5	0	1	1	0	3	0	0	0
Hemiptera: Auchenorrhyncha	Hexapoda	1	36	2	0	0	0	19	0	3	1	0	0	0	0	0
Hemiptera: Heteroptera	Hexapoda	30	8	0	0	0	1	26	3	0	1	0	0	0	1	0
Hemiptera: Sternorrhyncha	Hexapoda	78	5	0	4	0	0	10	1	1	4	0	0	0	0	1
Hymenoptera	Hexapoda	782	614	115	37	1	5	191	14	28	26	2	7	2	3	13
Isopoda	Hexapoda	15	0	0	0	0	0	6	0	0	0	0	0	0	2	0
Lepidoptera: Glossata	Hexapoda	0	0	0	0	0	0	0	0	0	0	0	0	0	0	0
Lepidoptera: Zeugloptera	Hexapoda	29	8	0	1	0	0	12	0	2	3	1	0	0	0	0
Lepidoptera Larvae	Hexapoda	0	0	0	0	0	0	0	0	0	0	0	0	0	0	0
Lophioneurida	Hexapoda	0	0	1	0	0	0	1	0	0	0	0	0	0	0	0
Mecoptera	Hexapoda	0	1	0	0	0	0	0	0	0	0	0	0	0	0	0
Neuroptera	Hexapoda	20	35	8	3	0	0	10	0	0	0	0	1	0	0	0
Odonata	Hexapoda	0	0	0	0	0	0	1	0	0	0	0	0	0	0	0
Opiliones	Chelicerata	0	0	0	0	0	0	1	0	0	0	0	0	0	0	0
Orthoptera	Hexapoda	12	0	1	2	0	0	46	2	1	0	0	0	0	0	0
Podocopa?	Crustacea	1	1	0	0	0	0	0	0	0	0	0	0	0	0	0
Pseudoescorpionida	Chelicerata	3	2	1	0	0	0	4	0	2	0	0	0	0	0	0
Psocodea	Hexapoda	108	39	8	7	0	2	42	1	0	5	0	2	0	1	1
Raphidioptera	Chelicerata	7	13	0	0	0	1	3	0	0	0	0	0	0	0	0
Scorpionida	Chelicerata	0	0	0	0	0	0	1	0	0	0	0	0	0	0	0
Strepsiptera	Hexapoda	1	0	0	0	0	0	1	2	0	3	0	4	0	0	0
Tanaidacea	"Crustacea"	31	4	0	0	0	0	10	0	1	0	0	3	0	0	0
Thysanoptera	Hexapoda	86	46	15	11	0	0	4	0	0	2	0	0	0	0	0
Trichoptera	Hexapoda	18	1	0	0	0	0	0	0	0	0	0	0	0	0	0
Zoraptera	Hexapoda	0	0	0	0	0	0	0	0	0	0	0	0	0	0	0
Zygentoma	Hexapoda	0	0	0	0	0	0	0	0	0	1	0	0	0	0	0
Larvae indet.	Arthropoda	0	0	0	0	0	0	0	0	0	0	0	0	0	0	0
insects indet.	Hexapoda	6	6	15	15	4	0	225	30	11	10	1	6	0	2	3
Arthropoda indet.	Arthropoda	165	4	0	0	0	0	5	0	3	1	0	2	0	0	0

## Sheet: Cretaceous amber-Diptera
	SPAIN (Albian)						FRANCE (Cenomanian)								CONGO (Aptian)
Orders	Spain: Peñacerrada	Spain: El Soplao	Spain: San Just	Spain: Ariño	Spain: La Hoya	Spain: Arroyo Pascueta	France: Archingeay-Les Nouillers	France: La Buzinie	France: Fouras	France: Cadeuil	France: Aix island	France: Fourtou	France: Renardières	France: Salignac	Congo: Doumanga
Anisopodidae	13	0	1	0	0	0	0	0	0	0	0	0	0	0	14
†Archizelmiridae	0	0	2	1	0	0	0	0	0	0	0	0	0	0	0
Atelestidae	22	4	0	0	0	0	0	0	0	0	0	0	0	0	0
Asilidae	0	0	0	0	0	0	0	0	0	0	0	0	0	0	0
Bibionidae	0	0	0	0	0	0	0	0	0	0	0	0	0	0	0
Bombilidae	1	0	0	0	0	0	0	0	0	0	0	0	0	0	0
Cecidomyiidae	7	4	0	2	0	0	2	0	0	0	0	0	0	0	0
Ceratopogonidae	239	142	32	2	0	1	62	0	0	0	0	0	0	0	0
Chaoboridae	0	0	0	0	0	0	0	0	6	7	0	0	0	0	3
Chimeromyiidae	39	10	2	0	0	0	0	0	0	0	0	0	0	0	0
Chironomidae	92	25	14	1	1	1	2	0	2	1	0	0	0	0	0
Chloropidae	0	0	0	0	0	0	11	0	1	5	0	1	0	0	1
Corethrelidae	0	0	0	0	0	0	0	0	0	0	0	0	0	0	0
Culicidae	0	0	0	0	0	0	0	0	0	0	0	0	0	0	0
Dixidae	1	0	0	0	0	0	0	0	0	0	0	0	0	0	0
Dolichopodidae	218	28	10	0	0	0	101	12	10	0	0	0	0	0	0
Drosophilidae	0	0	0	0	0	0	0	0	0	0	0	0	0	0	0
Empididae	1	10	1	0	0	0	0	0	0	0	0	0	0	0	0
Hybotidae	1	5	0	0	2	0	0	0	0	0	0	0	0	0	0
Ironomyiidae	1	1	1	0	0	0	0	0	0	0	0	0	0	0	0
Keroplatidae	4	4	4	0	0	0	0	0	0	0	0	0	0	0	0
Limnophilidae	1	0	0	0	0	0	0	0	0	0	0	0	0	0	0
Limoniidae	26	7	1	0	0	0	14	0	0	0	0	0	0	0	0
Lonchopteridae	86	6	1	0	0	0	0	0	0	0	0	0	0	0	0
Lygistorrhinidae	0	0	0	0	0	0	0	0	0	0	0	0	0	0	0
Microphoritidae	26	10	0	0	0	0	0	0	0	0	0	0	0	0	0
Milichidae	0	0	0	0	0	0	0	0	0	0	0	0	0	0	0
Micropezidae	0	0	0	0	0	0	0	0	0	0	0	0	0	0	0
Muscidae	0	0	0	0	0	0	0	0	0	0	0	0	0	0	0
Mycetophilidae	14	1	0	0	0	0	1	1	0	0	0	0	0	0	0
Neriidae	0	0	0	0	0	0	0	0	0	0	0	0	0	0	0
Phoridae	38	7	3	0	0	0	12	0	1	0	0	0	0	0	0
Platypecidae	2	0	0	0	0	0	0	0	0	0	0	0	0	0	0
Pipunculidae	0	0	0	0	0	0	0	0	0	0	0	0	0	0	0
Psychodidae	179	24	3	1	0	0	26	1	0	2	0	0	0	0	0
Ptychopteridae	1	1	0	0	0	0	0	0	0	0	0	0	0	0	0
Rhagionidae	36	5	5	3	0	0	4	0	0	0	0	0	0	0	0
Scatopsidae	37	5	1	1	0	0	0	0	0	0	0	0	0	0	0
Sciaridae	2	1	0	0	0	0	0	0	0	0	0	0	0	0	0
Scenopinidae?	3	2	0	0	0	0	0	0	0	0	0	0	0	0	0
Simuliidae	0	0	0	0	0	0	0	0	0	0	0	0	0	0	0
Stratiomyomorpha	1	0	0	0	0	0	0	0	0	0	0	0	0	0	0
Syrphidae	0	0	0	0	0	0	0	0	0	0	0	0	0	0	0
Tabanidae	0	0	0	0	0	0	0	0	0	0	0	0	0	0	0
Tachinidae	0	0	0	0	0	0	0	0	0	0	0	0	0	0	0
Tabanomorpha	0	0	0	0	0	0	0	0	0	0	0	0	0	0	0
Tanyderidae	3	0	0	0	0	0	0	0	0	0	0	0	0	0	0
Tephritidae	0	0	0	0	0	0	0	0	0	0	0	0	0	0	0
†Tethepomyiidae	5	0	0	0	0	0	0	0	0	0	0	0	0	0	0
Therevidae?	0	0	0	0	0	0	0	0	0	0	0	0	0	0	0
Tipulidae	0	0	0	0	0	0	0	0	0	0	0	0	0	0	0
Tipulomorpha	0	0	0	0	0	0	0	0	0	0	0	0	0	0	0
Xylomyidae	1	1	0	0	0	0	0	0	0	0	0	0	0	0	0
Xylophagidae?	0	0	0	0	0	0	0	0	0	0	0	0	0	0	0
†Zhangsolvidae	4	6	0	0	0	0	0	0	0	0	0	0	0	0	0
Diptera: Nematocera indet.	31	14	0	0	0	0	36	1	1	2	0	0	0	0	0
Diptera: Brachycera indet.	41	17	0	0	0	0	159	3	1	0	1	2	1	0	1
Diptera indet.	53	87	18	13	0	2	59	5	0	2	0	0	0	0	1
Diptera larvae	0	0	0	0	0	0	0	0	0	0	0	0	0	0	0

## Sheet: Eocene Amber -Orders
		AUSTRALIA (EOCENE)
Phylum/Class/Orders	Subphylum	Amber
Acari	Chelicerata	3
Amphipoda indet.	"Crustacea"	0
Arachnida indet.	Chelicerata	0
Araneae	Chelicerata	1
Archaeognatha	Hexapoda	0
Chilopoda	Myriapoda	0
Coleoptera	Hexapoda	0
Collembola	Hexapoda	5
Dermaptera	Hexapoda	0
Diplopoda	Myriapoda	0
Diplostraca: Cladocera	"Crustacea"	0
Diplura	Hexapoda	0
Diptera	Hexapoda	20
Dyctioptera: Blattaria	Hexapoda	0
Dyctioptera: Mantodea	Hexapoda	0
Dictyoptera: Termitoidea	Hexapoda	0
Dyctioptera indet.	Hexapoda	0
Embidiina	Hexapoda	0
Ephemeroptera	Hexapoda	0
Hemiptera	Hexapoda	0
Hemiptera: Auchenorrhyncha	Hexapoda	2
Hemiptera: Heteroptera	Hexapoda	2
Hemiptera: Sternorrhyncha	Hexapoda	0
Hymenoptera	Hexapoda	4
Isopoda	Hexapoda	0
Lepidoptera: Glossata	Hexapoda	0
Lepidoptera: Zeugloptera	Hexapoda	1
Lepidoptera Larvae	Hexapoda	0
Lophioneurida	Hexapoda	0
Mecoptera	Hexapoda	0
Neuroptera	Hexapoda	0
Odonata	Hexapoda	0
Opiliones	Chelicerata	0
Orthoptera	Hexapoda	0
Podocopa?	Crustacea	0
Pseudoescorpionida	Chelicerata	0
Psocodea	Hexapoda	0
Raphidioptera	Chelicerata	0
Scorpiones	Chelicerata	0
Strepsiptera	Hexapoda	0
Tanaidacea	"Crustacea"	0
Thysanoptera	Hexapoda	0
Trichoptera	Hexapoda	0
Zoraptera	Hexapoda	0
Zygentoma	Hexapoda	0
Larvae indet.	Arthropoda	0
insects indet.	Hexapoda	1
Arthropoda indet.	Arthropoda	7

## Sheet: Eocene Amber -Diptera
	AUSTRALIA (EOCENE)
Families	Amber
Anisopodidae	0
†Archizelmiridae	0
Atelestidae	0
Asilidae	0
Bibionidae	0
Bombilidae	0
Cecidomyiidae	0
Ceratopogonidae	5
Chaoboridae	0
Chimeromyiidae	0
Chironomidae	2
Chloropidae	0
Corethrelidae	0
Culicidae	0
Dixidae	0
Dolichopodidae	6
Drosophilidae	0
Empididae	0
Hybotidae	0
Ironomyiidae	0
Keroplatidae	0
Limnophilidae	0
Limoniidae	0
Lonchopteridae	0
Lygistorrhinidae	0
Micropharidae?	0
Milichidae	0
Micropezidae	0
Muscidae	0
Mycetophilidae	1
Neriidae	0
Phoridae	0
Platypecidae	0
Pipunculidae	0
Psychodidae	0
Ptychopteridae	0
Rhagionidae	0
Scatopsidae	0
Sciaridae	0
Scenopinidae?	0
Simuliidae	0
Stratiomyomorpha	0
Syrphidae	0
Tabanidae	0
Tachinidae	0
Tabanomorpha	0
Tanyderidae	0
Tephritidae	0
†Tethepomyiidae	0
Therevidae?	0
Tipulidae	1
Tipulomorpha	0
Xylomyidae	0
Xylophagidae?	0
†Zhangsolvidae	0
Diptera: Nematocera indet.	3
Diptera: Brachycera indet.	0
Diptera indet.	2
Diptera larvae	0

## Sheet: Miocene-Holocene amber-copal Or
		DOMINICAN REPUBLIC (Miocene)		MEXICO (Miocene)	TANZANIA (Holocene)	DOMINICAN REPUBLIC (Holocene)
Phylum/Class/Orders	Subphylum	Do amber (J.C coll.)	Do amber (Poinar, 1999)	Mx amber (3 coll.)*	Copal 1901 TZ	Copal Cotui Do
Acari	Chelicerata	89	3	73	12	16
Amphipoda indet.	"Crustacea"	0	0	0	0	0
Arachnida indet.	Chelicerata	0	0	0	0	0
Araneae	Chelicerata	98	88	108	54	19
Archaeognatha	Hexapoda	10	0	4	0	0
Chilopoda	Myriapoda	2	1	3	0	0
Coleoptera	Hexapoda	216	201	215	64	15
Collembola	Hexapoda	577	21	95	6	5
Dermaptera	Hexapoda	3	0	0	0	1
Diplopoda	Myriapoda	1	5	6	0	0
Diplostraca: Cladocera	"Crustacea"	0	0	0	0	0
Diplura	Hexapoda	0	0	2	0	0
Diptera	Hexapoda	1298	1017	1041	317	141
Dyctioptera: Blattaria	Hexapoda	15	3	13	21	0
Dyctioptera: Mantodea	Hexapoda	1	0	0	0	0
Dictyoptera: Termitoidea	Hexapoda	82	86	65	14	3
Dyctioptera indet.	Hexapoda	0	0	0	0	0
Embidiina	Hexapoda	1	0	0	0	0
Ephemeroptera	Hexapoda	1	0	18	0	0
Hemiptera	Hexapoda	0	0	0	0	0
Hemiptera: Auchenorrhyncha	Hexapoda	150	94	200	28	0
Hemiptera: Heteroptera	Hexapoda	20	13	28	5	1
Hemiptera: Sternorrhyncha	Hexapoda	10	0	6	22	2
Hymenoptera	Hexapoda	738	1107	772	245	90
Isopoda	Hexapoda	3	0	5	0	0
Lepidoptera: Glossata	Hexapoda	2	0	0	0	0
Lepidoptera: Zeugloptera	Hexapoda	60	60	15	16	3
Lepidoptera Larvae	Hexapoda	4	0	0	0	0
Lophioneurida	Hexapoda	0	0	0	0	0
Mecoptera	Hexapoda	0	0	0	0	0
Neuroptera	Hexapoda	2	0	1	1	0
Odonata	Hexapoda	0	0	0	0	0
Opiliones	Chelicerata	0	0	0	0	1
Orthoptera	Hexapoda	15	18	19	12	0
Podocopa?	Crustacea	0	0	0	0	0
Pseudoescorpionida	Chelicerata	4	0	5	0	1
Psocodea	Hexapoda	83	173	63	19	7
Raphidioptera	Chelicerata	0	0	0	0	0
Scorpionida	Chelicerata	1	0	1	1	0
Strepsiptera	Hexapoda	0	0	0	0	0
Tanaidacea	"Crustacea"	0	0	0	0	0
Thysanoptera	Hexapoda	43	6	28	9	1
Trichoptera	Hexapoda	5	8	33	0	0
Zoraptera	Hexapoda	0	0	0	0	0
Zygentoma	Hexapoda	0	0	0	0	0
Larvae indet.	Arthropoda	0	0	0	0	0
insects indet.	Hexapoda	109	0	0	38	13
Arthropoda indet.	Arthropoda	8	0	0	0	0

## Sheet: Miocene-Holocene amber-copal Di
	DOMINICAN REPUBLIC (Miocene)		MEXICO (Miocene)	TANZANIA (Holocene)	DOMINICAN REPUBLIC (Holocene)
Families	Do amber (J.C coll.)	Do amber (Poinar, 1999)	Mx amber ( 3 coll.)*	Copal 1901 TZ	Copal Cotui DO
Anisopodidae	2	0	1	0	1
†Archizelmiridae	0	0	0	0	0
Atelestidae	0	0	0	0	0
Asilidae	0	0	2	2	0
Bibionidae	4	0	0	1	0
Bombilidae	0	0	0	0	0
Cecidomyiidae	428	197	367	43	9
Ceratopogonidae	73	81	58	14	8
Chaoboridae	0	0	0	0	0
Chimeromyiidae	0	0	0	0	0
Chironomidae	46	89	58	5	15
Chloropidae	0	0	0	1	1
Corethrelidae	0	0	0	0	0
Culicidae	5	0	13	0	0
Dixidae	0	0	0	0	0
Dolichopodidae	53	0	44	5	5
Drosophilidae	0	0	7	0	0
Empididae	12	0	12	1	0
Hybotidae	0	0	0	0	0
Ironomyiidae	0	0	0	0	0
Keroplatidae	20	0	4	0	0
Limnophilidae	0	0	0	0	0
Limoniidae	10	0	2	0	0
Lonchopteridae	0	0	0	0	0
Lygistorrhinidae	1	0	0	1	0
Micropharidae?	0	0	0	0	0
Milichidae	1	0	0	0	0
Micropezidae	0	0	0	0	0
Muscidae	0	0	0	6	0
Mycetophilidae	78	110	26	4	1
Neriidae	0	0	0	1	0
Phoridae	103	34	122	44	11
Platypecidae	0	0	0	0	0
Pipunculidae	0	0	0	0	0
Psychodidae	79	97	82	99	3
Ptychopteridae	0	0	0	0	0
Rhagionidae	1	0	0	1	0
Scatopsidae	65	124	10	6	1
Sciaridae	197	57	62	26	32
Scenopinidae?	0	0	0	0	0
Simuliidae	0	0	0	0	0
Stratiomyomorpha	1	0	0	0	0
Syrphidae	1	0	0	1	0
Tabanidae	0	0	3	3	0
Tachinidae	0	0	0	0	0
Tabanomorpha	1	0	0	0	0
Tanyderidae	0	0	0	0	0
Tephritidae	1	0	0	0	0
†Tethepomyiidae	0	0	0	0	0
Therevidae?	0	0	0	0	0
Tipulidae	1	6	6	1	0
Tipulomorpha	3	0	0	0	0
Xylomyidae	0	0	0	0	0
Xylophagidae?	0	0	0	0	0
†Zhangsolvidae	0	0	0	0	0
Diptera: Nematocera indet.	34	62	58	6	11
Diptera: Brachycera indet.	21	149	46	41	36
Diptera indet.	50	0	0	5	3
Diptera larvae	8	0	0	0	4

## Sheet: R-ST-M-Hymenaea-Agathis-Orders
		MADAGASCAR						MEXICO			NEW CALEDONIA
Phylum/Class/Orders	Subphylum	Resin H.v. 2013 MG	Resin H.v. 2015 MG	ST H.v. Total 0m MG	ST H.v. Total 1m MG	ST H.v. Total 2m MG	Total ST H.v. 2013 MG	Total ST H.c 2012 MX	M H.v. 2013 MG	M H.c. 2010-2012 MX	Resin Agathis NC	ST A.l. 0m Total NC	ST A.l. 1m Total NC	ST A.l. 2m Total NC	Total ST A.l. 2016 NC	Malaise A.l. Total NC
Acari	Chelicerata	194	463	845	394	115	1355	301	239	209	13	100	17	15	132	35
Amphipoda indet.	"Crustacea"	0	0	0	0	0	0	0	0	0	0	0	0	0	0	0
Arachnida indet.	Chelicerata	0	0	0	0	0	0	0	0	0	0	0	0	0	0	0
Araneae	Chelicerata	71	127	160	106	94	360	111	16	97	1	69	48	68	185	11
Archaeognatha	Hexapoda	0	0	0	1	0	1	0	0	0	0	0	0	0	0	0
Chilopoda	Myriapoda	0	0	0	0	0	0	0	0	0	0	0	0	0	0	0
Coleoptera	Hexapoda	126	120	162	272	246	680	631	110	667	2	170	83	79	332	204
Collembola	Hexapoda	71	301	650	435	182	1267	464	805	992	8	835	492	680	2007	1130
Dermaptera	Hexapoda	0	0	1	3	4	0	0	0	0	0	0	0	0	0	0
Diplopoda	Myriapoda	1	0	0	0	0	0	3	0	0	0	1	0	0	1	0
Diplostraca: Cladocera	"Crustacea"	0	0	0	0	0	0	0	0	0	0	0	0	0	0	0
Diplura	Hexapoda	1	0	0	0	0	0	0	0	0	0	0	0	0	0	0
Diptera	Hexapoda	718	446	1751	1125	1090	3841	4980	3428	9518	1	3704	438	2880	7022	1332
Dyctioptera: Blattaria	Hexapoda	0	8	2	0	2	4	28	0	11	0	5	5	10	20	7
Dyctioptera: Mantodea	Hexapoda	0	0	2	0	0	2	0	3	0	0	0	0	0	0	0
Dictyoptera: Termitoidea	Hexapoda	6	19	8	11	57	76	599	0	16	0	2	2	3	7	3
Dyctioptera indet.	Hexapoda	0	0	0	0	0	0	0	0	0	0	0	0	0	0	0
Embidiina	Hexapoda	0	2	0	0	0	0	10	0	0	0	0	0	0	0	0
Ephemeroptera	Hexapoda	0	0	0	0	0	8	2	1	4	0	0	0	0	0	0
Hemiptera	Hexapoda	0	0	0	0	0	0	0	0	0	0	0	0	0	0	0
Hemiptera: Auchenorrhyncha	Hexapoda	2	18	173	68	92	333	372	73	583	0	144	209	236	589	120
Hemiptera: Heteroptera	Hexapoda	5	2	9	8	4	21	89	8	61	0	0	3	3	6	3
Hemiptera: Sternorrhyncha	Hexapoda	20	48	14	23	58	95	89	0	26	0	19	6	28	53	2
Hymenoptera	Hexapoda	467	325	2151	1436	1003	4590	1369	135	1162	12	587	331	452	1370	278
Isopoda	Hexapoda	0	1	0	0	0	0	0	0	0	0	4	1	0	5	0
Lepidoptera: Glossata	Hexapoda	0	0	0	0	0	0	0	54	238	0	0	0	0	0	0
Lepidoptera: Zeugloptera	Hexapoda	3	13	45	56	68	169	16	218	559	0	24	53	93	170	225
Lepidoptera Larvae	Hexapoda	0	39	0	0	0	0	0	0	0	0	0	0	0	0	0
Lophioneurida	Hexapoda	0	0	0	0	0	0	0	0	0	0	0	0	0	0	0
Mecoptera	Hexapoda	0	0	0	0	0	0	0	0	0	0	0	0	0	0	0
Neuroptera	Hexapoda	1	0	0	0	0	0	5	0	8	0	0	0	0	0	0
Odonata	Hexapoda	0	0	1	0	1	2	0	0	0	0	0	2	3	5	0
Opiliones	Chelicerata	0	0	0	0	0	0	0	0	0	0	0	0	0	0	0
Orthoptera	Hexapoda	0	3	6	1	2	9	24	4	210	0	9	4	8	21	0
Podocopa?	Crustacea	0	0	0	0	0	0	0	0	0	0	0	0	0	0	0
Pseudoescorpionida	Chelicerata	0	3	0	0	0	0	2	3	0	3	0	0	0	0	0
Psocodea	Hexapoda	52	100	39	15	26	80	82	21	196	0	6	3	18	27	48
Raphidioptera	Chelicerata	0	0	0	0	0	0	0	0	0	0	0	0	0	0	0
Scorpiones	Chelicerata	0	0	0	0	0	0	0	0	0	0	0	0	0	0	0
Strepsiptera	Hexapoda	0	0	0	0	0	0	0	0	0	0	0	0	0	0	0
Tanaidacea	"Crustacea"	0	0	0	0	0	0	0	0	0	0	0	0	0	0	0
Thysanoptera	Hexapoda	6	25	49	16	20	85	254	2	20	1	96	141	205	442	1
Trichoptera	Hexapoda	2	0	3	2	4	9	10	11	44	0	0	0	0	0	0
Zoraptera	Hexapoda	0	0	0	0	0	0	0	0	0	0	0	0	0	0	0
Zygentoma	Hexapoda	0	1	0	0	0	0	0	0	0	0	0	0	0	0	0
Larvae indet.	Arthropoda	0	10	6	7	11	0	0	3	0	0	1	0	3	4	0
insects indet.	Hexapoda	41	89	0	0	0	0	0	0	0	0	0	0	0	0	0
Arthropoda indet.	Arthropoda	0	17	0	0	0	0	0	0	0	7	0	0	0	0	0

## Sheet: R-ST-M-Hymenaea-Agathis-Diptera
	MADAGASCAR						MEXICO	MADAGASCAR	MEXICO	NEW CALEDONIA
Families	Resin H.v. 2013 MG	Resin H.v. 2015 MG	ST H.v. Total 0 m MG	ST H.v. Total 1 m MG	ST H.v. Total 2 m MG	Total ST H.v. 2013 MG	Total ST H.c 2012 MX	M H.v. 2013 MG	M H.c. 2010-2012 MX	Resin Agathis 2016 NC	ST. A.l. 3 Total 0 NC	ST. A.l. 3 Total 1 m NC	ST. A.l. 3 Total 2 m NC	Total ST A.l. 2016 NC	Malaise A.l. Total NC
Anisopodidae	1	0	0	0	0	0	0	0	1	0	0	0	0	0	0
†Archizelmiridae	0	0	0	0	0	0	0	0	0	0	0	0	0	0	0
Atelestidae	0	0	0	0	0	0	0	0	0	0	0	0	0	0	0
Asilidae	1	0	0	0	0	0	3	0	1	0	0	0	2	2	11
Bibionidae	0	0	0	0	0	0	0	0	0	0	0	0	0	0	0
Bombilidae	0	0	0	0	0	0	0	0	0	0	0	0	0	0	0
Cecidomyiidae	57	219	9	32	40	81	112	526	4886	0	6	19	16	41	113
Ceratopogonidae	57	10	21	49	71	141	31	28	275	0	0	3	2	5	40
Chaoboridae	0	0	0	0	0	0	0	133	2	0	0	0	0	0	0
Chimeromyiidae	0	0	0	0	0	0	0	0	0	0	0	0	0	0	0
Chironomidae	151	8	310	354	412	1076	315	2159	844	0	22	13	27	62	413
Chloropidae	113	5	8	10	7	25	0	0	0	0	63	27	37	127	5
Corethrelidae	0	0	0	0	0	0	0	1	3	0	0	0	0	0	0
Culicidae	0	0	1	2	1	4	0	19	52	0	0	0	0	0	4
Dixidae	0	0	0	0	0	0	0	0	0	0	0	0	0	0	0
Dolichopodidae	2	6	17	48	72	137	137	0	158	0	14	13	13	40	13
Drosophilidae	2	0	0	0	0	0	40	0	196	0	0	0	0	0	5
Empididae	2	19	20	6	9	35	44	6	1	0	3	2	2	7	13
Hybotidae	0	0	0	0	0	0	0	0	0	0	0	0	0	0	0
Ironomyiidae	0	0	0	0	0	0	0	0	0	0	0	0	0	0	0
Keroplatidae	0	0	1	1	0	2	0	67	35	0	2	0	1	3	3
Limnophilidae	0	0	0	0	0	0	0	0	0	0	0	0	0	0	0
Limoniidae	8	0	0	1	2	3	2	4	202	0	0	2	0	2	2
Lonchopteridae	1	0	0	0	0	0	0	0	0	0	0	0	0	0	0
Lygistorrhinidae	0	0	2	0	0	2	0	1	0	0	0	0	0	0	0
Micropharidae?	0	0	0	0	0	0	0	0	0	0	0	0	0	0	0
Milichidae	0	0	0	0	0	0	0	0	0	0	0	0	0	0	0
Micropezidae	0	0	0	0	0	0	6	0	5	0	0	0	0	0	0
Muscidae	2	0	5	5	0	10	1	0	15	0	37	1	1	39	2
Mycetophilidae	36	0	0	0	0	0	11	17	391	0	0	1	0	1	7
Neriidae	0	0	0	0	0	0	0	0	0	0	0	0	0	0	0
Phoridae	50	63	487	176	92	755	1597	326	75	0	3180	223	2530	5933	1
Platypecidae	0	0	0	0	0	0	0	0	0	0	0	0	0	0	0
Pipunculidae	0	0	0	0	0	0	0	0	0	0	1	0	0	1	0
Psychodidae	29	26	47	76	22	145	51	11	498	0	3	11	11	25	479
Ptychopteridae	0	0	0	0	0	0	0	0	0	0	0	0	0	0	0
Rhagionidae	0	0	0	0	0	0	0	0	0	0	0	0	0	0	0
Scatopsidae	3	2	3	4	2	9	4	0	1	0	1	13	27	41	2
Sciaridae	82	36	716	195	178	1089	1876	154	1636	0	36	40	72	148	72
Scenopinidae?	0	0	0	0	0	0	0	0	0	0	0	0	0	0	0
Simuliidae	1	0	3	0	0	3	0	0	0	0	0	0	0	0	0
Stratiomyomorpha	0	0	0	0	0	0	0	0	12	0	1	0	0	1	0
Syrphidae	0	0	1	0	0	1	0	0	0	0	0	0	0	0	0
Tabanidae	0	0	0	5	0	5	0	0	1	0	1	0	0	1	3
Tachinidae	2	0	0	0	0	0	0	0	0	0	0	0	0	0	0
Tabanomorpha	0	0	0	0	0	0	0	0	0	0	0	0	0	0	0
Tanyderidae	0	0	0	0	0	0	0	0	0	0	0	0	0	0	0
Tephritidae	0	1	0	0	0	0	9	0	2	0	0	0	0	0	0
†Tethepomyiidae	0	0	0	0	0	0	0	0	0	0	0	0	0	0	0
Therevidae?	0	0	0	0	0	0	0	0	0	0	0	0	0	0	2
Tipulidae	0	0	0	0	0	0	0	0	4	0	0	0	0	0	0
Tipulomorpha	0	0	0	0	0	0	0	0	0	0	0	0	0	0	0
Xylomyidae	0	0	0	0	0	0	0	0	0	0	0	0	0	0	0
Xylophagidae?	0	0	0	0	0	0	0	0	0	0	0	0	0	0	0
†Zhangsolvidae	0	0	0	0	0	0	0	0	0	0	0	0	0	0	0
Diptera: Nematocera indet.	16	6	27	39	12	78	354	16	67	0	16	23	15	54	0
Diptera: Brachycera indet.	67	27	54	33	15	102	387	103	155	0	77	20	51	148	66
Diptera indet.	34	19	0	0	0	0	0	0	0	1	0	0	0	0	0
Diptera larvae	0	0	0	0	0	0	0	0	0	0	0	0	0	0	0
