# Supplementary material for: Agathis vs. Hymenaea—trapping biases to interpret arthropod assemblages in ambers
Source: BMC Biol. 2025 Nov 7;23:337. doi: 10.1186/s12915-025-02453-y (PMC12593905; doi:10.1186/s12915-025-02453-y)
Supplement: Supplementary file 4 — Additional file 4. Arthropod inclusions per gram of resin. [file 12915_2025_2453_MOESM4_ESM.xlsx]

## Sheet: R2MG
MADAGASCAR
N. piece from the field	Arthropod inclusions	Resin in grams
2R1.9	0	4.17
2R1.12	0	4.75
2R1.13	0	1.84
2R1.15	0	1.17
2R1.16	0	0.16
2R1.17	0	0.16
2R1.19	0	0.24
2R1.20	0	0.86
2R1.21	0	2.83
2R1.22	0	0.32
2R1.23	0	0.31
2R1.24	0	0.26
2R1.25	0	0.27
2R1.27	0	1.18
2R1.28	0	0.12
2R1.29	0	0.31
2R1.30	0	0.51
2R1.32	0	0.57
2R1.T1	0	3.9
2R1.T2	0	4.53
2R1.T3	0	0.93
2R1.T5	0	1.21
2R1.T6	0	1.2
2R1.T8	0	0.54
2R1.T9	0	0.47
2R1.T10	0	0.5
2R2.1	0	1.1
2R3.1	0	0.49
2R3.2	0	0.32
2R3.3	0	0.3
2R3.4	0	0.1
2R3.5	0	0.04
2R3.6	0	0.05
2R3.7	0	0.03
2R3.8	0	0.75
2R3.9	0	0.5
2R3.12	0	0.22
2R3.13	0	0.65
2R3.15	0	0.1
2R3.16	0	0.04
2R3.17	0	0.1
2R3.18	0	0.12
2R3.19	0	0.14
2R3.28	0	0.3
2R3.30	0	0.28
2R3.34	0	0.35
2R3.35	0	0.42
2R4A.1	0	72.02
2R4A.2	0	4.6
2R4A.5	0	4.58
2R4A.9	0	0.71
2R4A.10	0	3.6
2R4A.12	0	1.54
2R4A.13	0	0.63
2R4A.14	0	0.99
2R4A.16	0	0.48
2R4A.17	0	0.21
2R4A.18	0	0.66
2R4A.19	0	0.66
2R4A.22	0	0.28
2R4A.23	0	0.43
2R4A.24	0	0.52
2R4A.26	0	0.14
2R4A.29	0	0.23
2R4A.30	0	0.21
2R4A.31	0	0.13
2R4A.32	0	0.61
2R4B.1	0	5.09
2R4B.3	0	0.72
2R4B.4	0	0.19
2R4B.5	0	0.17
2R4B.6	0	0.06
2R4B.7	0	0.29
2R4B.8	0	0.06
2R4B.9	0	0.1
2R4C.1	0	20.47
2R4C.2	0	2.29
2R4C.3	0	0.13
2R4C.4	0	0.08
2R4C.5	0	3.46
2R4C.6	0	0.1
2R4C.7	0	0.06
2R4C.8	0	0.04
2R4D.2	0	0.06
2R4D.3	0	0.15
2R4D.4	0	0.13
2R4D.5	0	0.29
2R4D.9	0	0.07
2R4D.10	0	0.41
2R4_Trunk.1	0	6.68
2R4_Trunk.3	0	11.67
2R4_Trunk.4	0	4.53
2R4_Trunk.5	0	1.14
2R4_Trunk.6	0	0.37
2R4_Trunk.7	0	0.17
2R4_Trunk.8	0	0.66
2R4_Trunk.9	0	0.2
2R4_Trunk.10	0	0.19
2R4_Trunk.12	0	0.05
2R4_Trunk.BIS.1	0	25.37
2R4_Trunk.BIS.2	0	9.91
2R4_Trunk.BIS.3	0	11.34
2R4_Trunk.BIS.4	0	0.93
2R4_Trunk.BIS.5	0	2.97
2R4_Trunk.BIS.6	0	0.73
2R4_Trunk.BIS.7	0	0.87
2R4_Trunk.BIS.8	0	0.83
2R4_Trunk.BIS.9	0	0.42
2R4_Trunk.BIS.10	0	0.23
2R4_Trunk.BIS.11	0	0.59
2R4_Trunk.BIS.12	0	0.18
2R4_Trunk.BIS.13	0	0.52
2R4_Trunk.BIS.14	0	0.36
2R4_Trunk.BIS.15	0	0.78
2R4_Trunk.BIS.16	0	0.5
2R4_Trunk.BIS.17	0	0.33
2R4_Trunk.BIS.18	0	1.12
2R4_Trunk.BIS.19	0	0.91
2R4_Trunk.BIS.20	0	1.19
2R4_Trunk.BIS.21	0	0.31
2R4_Trunk.BIS.22	0	0.23
2R4_Trunk.BIS.24	0	0.26
2R4_Trunk.BIS.25	0	0.32
2R4_Trunk.BIS.26	0	0.28
2R4_Trunk.BIS.27	0	0.2
2R4_Trunk.BIS.28	0	0.21
2R4_Trunk.BIS.29	0	0.29
2R4_Trunk.BIS.31	0	0.16
2R4.1	0	19.14
2R4.3	0	4.39
2R4.4	0	6.03
2R4.5	0	7.07
2R4.6	0	4.53
2R4.8	0	2.69
2R4.9	0	6.09
2R4.10	0	2.87
2R4.root.3	0	0.47
2R4.root.4	0	0.84
2R4.root.5	0	0.59
2R4.root.6	0	0.12
2R4.root.8	0	0.23
2R4.root.9	0	0.03
2R4_offspring stem.1	0	1.94
2R4_offspring stem.3	0	0.35
2R4_offspring stem.4	0	0.2
2R4_offspring stem.5	0	0.53
2R4_offspring stem.6	0	0.19
2R4_offspring stem.7	0	1.48
2R4_offspring stem.9	0	0.16
2R4_offspring stem.10	0	0.34
2R4_offspring stem.11	0	0.76
2R4_offspring stem.12	0	0.31
2R4_offspring stem.13	0	0.23
2R4_offspring stem.14	0	0.17
2R4_offspring stem.15	0	0.29
2R4_offspring stem.16	0	0.19
2R4_offspring stem.17	0	0.24
2R4_offspring stem.18	0	0.16
2R7.1	0	6.64
2R7.3	0	0.55
2R7.5	0	0.27
2R7.6	0	0.24
2R7.7	0	0.39
2R7.8	0	0.49
2R7.9	0	0.12
2R7.10	0	0.17
2R8_0-50cm.2	0	0.28
2R8_0-50cm.4	0	0.41
2R8_0-50cm.6	0	0.67
2R8_0-50cm.8	0	0.48
2R8_0-50cm.10	0	0.59
2R8_0-50cm.12	0	0.41
2R8_0-50cm.15	0	0.17
2R8_0-50cm.18	0	0.64
2R8_0-50cm.19	0	0.16
2R8_0-50cm.20	0	1.05
2R8_50-100cm.1	0	1.71
2R8_50-100cm.2	0	1.61
2R8_50-100cm.4	0	0.3
2R8_50-100cm.7	0	0.37
2R8_50-100cm.9	0	0.39
2R8_50-100cm.10	0	0.29
2R8_50-100cm.11	0	0.58
2R8_50-100cm.14	0	0.2
2R8_50-100cm.15	0	0.44
2R8_50-100cm.16	0	0.25
2R8_50-100cm.18	0	0.19
2R8_100-150cm.3	0	1.95
2R8_100-150cm.6	0	1.84
2R8_100-150cm.8	0	0.87
2R8_100-150cm.9	0	0.33
2R8_100-150cm.15	0	0.62
2R8_100-150cm.16	0	1.03
2R8_100-150cm.17	0	1.99
2R8_100-150cm.19	0	0.43
2R8_100-150cm.20	0	0.9
2R8_100-150cm.21	0	0.66
2R8_100-150cm.26	0	0.55
2R8_100-150cm.27	0	0.39
2R8_100-150cm.28	0	0.64
2R8_100-150cm.29	0	0.48
2R8_100-150cm.31	0	0.54
2R8_100-150cm.32	0	0.59
2R8_100-150cm.37	0	0.5
2R8_100-150cm.39	0	0.34
2R8_100-150cm.41	0	0.27
2R8_100-150cm.45	0	0.08
2R8_150-200cm.1	0	0.41
2R8_150-200cm.5	0	0.63
2R8_200-250cm.1	0	0.73
2R8_200-250cm.3	0	0.51
2R8_200-250cm.4	0	0.36
2R8_200-250cm.5	0	0.42
2R8_200-250cm.6	0	0.45
2R8_200-250cm.7	0	0.26
2R8_200-250cm.8	0	0.44
2R8_200-250cm.9	0	0.27
2R8_200-250cm.10	0	0.17
2R8_200-250cm.11	0	0.17
2R8_200-250cm.12	0	0.16
2R9.4	0	1.3
2R9.5	0	1.19
2R9.6	0	0.93
2R9.7	0	0.35
2R9.9	0	1.57
2R9.10	0	0.26
2R9.11	0	0.43
2R9.17	0	3.24
2R9.root.6	0	0.18
2R9.root.7	0	0.33
2R9.root.8	0	0.13
2R9.root.9	0	0.17
2R9.root.10	0	0.19
2R9.root.11	0	0.15
2R10.2	0	9.56
2R10.13	0	2.43
2R10.27	0	1.08
2R10.38	0	0.68
2R10.45	0	0.96
2R10.46	0	0.6
2R10.47	0	0.54
2R10.48	0	0.79
2R10.49	0	0.98
2R10.54	0	0.75
2R10.55	0	0.48
2R10.56	0	0.88
2R10.59	0	2.16
2R10.64	0	0.49
2R10.70	0	0.44
2R10.71	0	0.48
2R10.77	0	0.45
2R10.78	0	0.28
2R10.80	0	0.72
2R10.81	0	0.48
2R10.82	0	0.61
2R10.86	0	0.65
2R10.90	0	1.27
2R10.91	0	0.54
2R10.98	0	0.35
2R10.105	0	0.25
2R10.106	0	0.27
2R10.107	0	0.46
2R10.109	0	0.31
2R10.110	0	0.27
2R10.111	0	0.39
2R10.112	0	0.34
2R10.113	0	0.37
2R10.115	0	0.41
2R10.116	0	0.36
2R10.117	0	0.73
2R10.118	0	0.3
2R10.119	0	0.13
2R10.121	0	0.39
2R10.123	0	0.29
2R10.124	0	0.42
2R10.128	0	0.3
2R10.132	0	0.19
2R10.133	0	0.26
2R10.134	0	0.19
2R10.135	0	0.29
2R10.136	0	0.21
2R10.151	0	0.35
2R10.153	0	0.26
2R10.159	0	0.07
2R10.161	0	0.05
2R10.165	0	0.22
2R10.166	0	0.24
2R10.170	0	0.11
2R10.176	0	0.11
2R10.179	0	0.05
2R10.181	0	0.15
2R10.195	0	0.55
2R10.202	0	0.81
2R10.203	0	2.59
2R10.207	0	4.18
2R10.208	0	2.76
2R10.209	0	5.22
2R10.210	0	0.77
2R10.211	0	0.4
2R10.219	0	0.34
2R10.221	0	0.75
2R10.222	0	0.71
2R10.223	0	0.3
2R10.225	0	0.56
2R10.226	0	0.36
2R10.231	0	0.38
2R10.234	0	0.45
2R10.235	0	0.51
2R10.239	0	0.2
2R10.240	0	0.38
2R10.241	0	0.44
2R10.245	0	0.4
2R10.248	0	1.05
2R10.251	0	0.18
2R10.252	0	0.25
2R10.253	0	0.33
2R10.254	0	0.21
2R10.255	0	0.29
2R10.256	0	0.33
2R10.257	0	0.11
2R10.259	0	0.4
2R10.260	0	0.26
2R10.261	0	0.44
2R10.262	0	0.57
2R10.265	0	0.27
2R10.268	0	0.21
2R10.270	0	0.87
2R10.271	0	0.25
2R10.272	0	0.4
2R10.274	0	0.36
2R10.275	0	0.26
2R10.278	0	0.22
2R10.280	0	0.26
2R10.288	0	0.15
2R10.294	0	0.17
2R10.299	0	0.05
2R10.304	0	0.06
2R10.309	0	0.01
2R10.cut.9	0	2.79
2R10.cut.10	0	7.14
2R10.cut.12	0	1.46
2R10.cut.16	0	0.41
2R10.cut.17	0	0.25
2R10.cut.20	0	0.52
2R10.cut.22	0	0.25
2R10.cut.24	0	0.08
2R10.cut.25	0	0.19
2R10.cut.26	0	0.09
2R10.cut.27	0	0.24
2R10.cut.28	0	0.09
2R10.cut.29	0	0.06
2R10.cut.32	0	0.17
2R10.cut.33	0	0.03
2R11.1	0	2.57
2R11.2	0	1.93
2R11.3	0	1.21
2R11.4	0	0.88
2R11.5	0	0.8
2R11.6	0	0.55
2R11.7	0	1.01
2R11.8	0	1.13
2R11.9	0	0.48
2R11.10	0	0.5
2R11.11	0	0.48
2R11.12	0	0.25
2R11.13	0	0.32
2R11.15	0	0.43
2R11.16	0	0.47
2R11.17	0	0.39
2R11.18	0	0.4
2R11.19	0	0.44
2R11.20	0	0.58
2R11.22	0	0.19
2R11.23	0	0.25
2R11.24	0	0.2
2R11.25	0	0.4
2R11.26	0	0.46
2R11.27	0	0.24
2R11.28	0	0.22
2R11.29	0	0.51
2R11.30	0	0.32
2R11.31	0	0.37
2R11.32	0	0.26
2R11.33	0	0.18
2R11.34	0	0.17
2R11.35	0	0.15
2R11.36	0	0.15
2R11.38	0	0.09
2R11.39	0	0.17
2R11.40	0	0.14
2R11.41	0	0.1
2R11.42	0	0.08
2R11.44	0	0.02
2R11.45	0	0.05
2R13.between the bark.1	0	7.54
2R13.between the bark.2	0	3.81
2R13.between the bark.3	0	7.06
2R13.between the bark.4	0	9.7
2R13.between the bark.5	0	0.23
2R13.between the bark.6	0	6.3
2R13.between the bark.7	0	3.06
2R13.between the bark.8	0	0.44
2R13.between the bark.9	0	0.35
2R13.between the bark.10	0	0.09
2R13.1	0	4.96
2R13.2	0	4.55
2R13.4	0	2.22
2R13.5	0	4.78
2R13.6	0	2.64
2R13.7	0	4.95
2R13.8	0	2.68
2R13.9	0	4.08
2R13.10	0	2.56
2R13.11	0	7.12
2R13.12	0	3.46
2R13.13	0	2.12
2R13.14	0	3.51
2R13.15	0	14.07
2R13.16	0	1.51
2R13.17	0	0.59
2R13.18	0	2.95
2R13.19	0	1.5
2R13.20	0	2.05
2R13.21	0	1.33
2R13.22	0	1.56
2R13.24	0	1.12
2R13.25	0	0.6
2R13.26	0	1.1
2R13.27	0	1.22
2R13.28	0	1.4
2R13.29	0	0.92
2R13.30	0	0.68
2R13.31	0	1.48
2R13.32	0	0.88
2R13.33	0	0.95
2R13.34	0	1.25
2R13.35	0	0.82
2R13.36	0	1.2
2R13.37	0	0.82
2R13.38	0	0.88
2R13.39	0	1.28
2R13.41	0	0.58
2R13.42	0	0.62
2R13.43	0	1
2R13.44	0	0.92
2R13.46	0	1.2
2R13.48	0	0.46
2R13.49	0	1.2
2R13.50	0	1.02
2R13.51	0	0.66
2R13.52	0	5.3
2R13.54	0	1.68
2R13.55	0	3.22
2R13.56	0	1.82
2R13.57	0	0.51
2R13.58	0	0.48
2R13.60	0	0.68
2R13.61	0	0.78
2R13.62	0	0.56
2R13.63	0	0.45
2R13.64	0	0.75
2R13.65	0	0.52
2R13.66	0	0.55
2R13.67	0	0.59
2R13.68	0	0.42
2R13.69	0	0.58
2R13.70	0	0.28
2R13.71	0	0.5
2R13.72	0	0.48
2R13.73	0	0.75
2R13.74	0	0.28
2R13.75	0	0.62
2R13.76	0	0.5
2R13.77	0	0.45
2R13.78	0	0.44
2R13.79	0	0.44
2R13.80	0	0.4
2R13.81	0	0.56
2R13.82	0	0.34
2R13.83	0	0.8
2R13.84	0	0.76
2R13.85	0	0.76
2R13.86	0	0.42
2R13.87	0	0.52
2R13.88	0	0.42
2R13.89	0	0.58
2R13.90	0	0.56
2R13.91	0	0.48
2R13.92	0	0.4
2R13.99	0	0.38
2R13.100	0	0.2
2R13.ground.1	0	15.06
2R13.ground.2	0	10.7
2R13.ground.3	0	0.1
2R13.ground.4	0	0.03
2R1.6	1	6.82
2R1.7	1	12.8
2R1.10	1	6.94
2R1.14	1	0.41
2R1.18	1	0.89
2R1.T4	1	1.57
2R2.22	1	1.17
2R2.28	1	0.01
2R2.31	1	0.34
2R2.35	1	0.1
2R2.39	1	0.07
2R2.44	1	0.14
2R2.46	1	0.04
2R2.48	1	0.06
2R2.56	1	0.08
2R2.57	1	0.08
2R2.63	1	0.08
2R2.64	1	0.01
2R2.69	1	2.75
2R3.10	1	0.22
2R3.14	1	0.1
2R3.24	1	0.08
2R3.25	1	0.15
2R3.27	1	0.6
2R3.33	1	0.08
2R4A.8	1	1.97
2R4A.11	1	0.25
2R4A.15	1	0.62
2R4A.25	1	0.44
2R4A.28	1	0.1
2R4A.33	1	0.14
2R4D.6	1	0.68
2R4D.7	1	0.31
2R4D.11	1	0.08
2R4_Trunk.11	1	0.04
2R4_Trunk.BIS.23	1	0.17
2R4_Trunk.BIS.30	1	0.59
2R4.2	1	23.74
2R4.11	1	2.31
2R4_offspring stem.8	1	1.13
2R7.4	1	0.22
2R8_0-50cm.1	1	0.13
2R8_0-50cm.3	1	0.26
2R8_0-50cm.7	1	0.36
2R8_0-50cm.11	1	0.28
2R8_0-50cm.13	1	0.42
2R8_0-50cm.21	1	1.94
2R8_50-100cm.3	1	0.05
2R8_50-100cm.5	1	0.6
2R8_50-100cm.8	1	0.5
2R8_50-100cm.12	1	0.27
2R8_50-100cm.17	1	0.48
2R8_50-100cm.19	1	0.26
2R8_50-100cm.22	1	0.57
2R8_50-100cm.23	1	0.09
2R8_50-100cm.24	1	0.05
2R8_50-100cm.26	1	0.11
2R8_50-100cm.27	1	0.17
2R8_50-100cm.28	1	0.05
2R8_50-100cm.29	1	0.06
2R8_100-150cm.2	1	2.12
2R8_100-150cm.4	1	1.29
2R8_100-150cm.18	1	0.77
2R8_100-150cm.24	1	0.6
2R8_100-150cm.25	1	0.77
2R8_100-150cm.33	1	0.42
2R8_100-150cm.34	1	0.39
2R8_100-150cm.35	1	0.55
2R8_100-150cm.36	1	0.35
2R8_100-150cm.38	1	0.29
2R8_100-150cm.40	1	0.34
2R8_100-150cm.42	1	0.07
2R8_100-150cm.43	1	0.15
2R8_100-150cm.44	1	0.05
2R8_100-150cm.46	1	0.17
2R8_100-150cm.47	1	0.05
2R8_150-200cm.2	1	0.52
2R8_150-200cm.3	1	0.57
2R8_150-200cm.6	1	0.55
2R8_150-200cm.8	1	0.06
2R8_150-200cm.10	1	0.23
2R8_150-200cm.11	1	0.32
2R8_150-200cm.13	1	0.69
2R8_150-200cm.14	1	0.21
2R8_150-200cm.15	1	0.29
2R8_150-200cm.16	1	0.21
2R8_150-200cm.17	1	0.41
2R8_150-200cm.18	1	0.11
2R8_200-250cm.13	1	0.03
2R9.1	1	0.66
2R9.12	1	0.21
2R9.13	1	0.32
2R9.15	1	0.08
2R9.root.1	1	2.99
2R9.root.2	1	3.22
2R9.root.3	1	0.53
2R9.root.4	1	0.68
2R9.root.5	1	1.29
2R9.root.12	1	0.03
2R9.root.13	1	0.15
2R10.14	1	1.38
2R10.15	1	2.45
2R10.17	1	2.24
2R10.18	1	2.15
2R10.19	1	2.26
2R10.20	1	1.96
2R10.23	1	1.4
2R10.24	1	0.95
2R10.29	1	0.9
2R10.37	1	0.73
2R10.40	1	1.87
2R10.53	1	0.63
2R10.57	1	1.08
2R10.62	1	0.59
2R10.65	1	0.66
2R10.73	1	0.42
2R10.74	1	0.42
2R10.75	1	0.31
2R10.79	1	0.48
2R10.85	1	0.34
2R10.88	1	0.44
2R10.92	1	0.34
2R10.93	1	0.52
2R10.100	1	0.45
2R10.101	1	0.75
2R10.108	1	0.4
2R10.120	1	0.4
2R10.122	1	0.21
2R10.126	1	0.32
2R10.127	1	0.56
2R10.130	1	0.22
2R10.131	1	0.15
2R10.141	1	0.34
2R10.143	1	0.29
2R10.148	1	0.26
2R10.149	1	0.13
2R10.152	1	0.12
2R10.154	1	0.21
2R10.155	1	0.08
2R10.156	1	0.15
2R10.157	1	0.09
2R10.164	1	0.05
2R10.167	1	0.1
2R10.168	1	0.18
2R10.169	1	0.1
2R10.171	1	0.05
2R10.172	1	0.19
2R10.173	1	0.08
2R10.174	1	0.11
2R10.175	1	0.22
2R10.177	1	0.01
2R10.178	1	0.1
2R10.180	1	0.01
2R10.185	1	2.29
2R10.187	1	1.52
2R10.193	1	1.96
2R10.194	1	0.57
2R10.197	1	2.2
2R10.200	1	1.27
2R10.205	1	7.18
2R10.206	1	5.15
2R10.212	1	0.84
2R10.216	1	0.45
2R10.217	1	0.71
2R10.224	1	0.61
2R10.228	1	0.35
2R10.229	1	0.57
2R10.233	1	0.94
2R10.237	1	0.37
2R10.238	1	0.42
2R10.242	1
2R10.246	1	0.24
2R10.247	1	0.31
2R10.258	1	0.19
2R10.263	1	0.28
2R10.264	1	0.17
2R10.269	1	0.12
2R10.276	1	0.32
2R10.277	1	1.14
2R10.282	1	0.19
2R10.283	1	0.18
2R10.284	1	0.08
2R10.290	1	0.01
2R10.291	1	0.05
2R10.292	1	0.07
2R10.293	1	0.16
2R10.295	1	0.13
2R10.296	1	0.08
2R10.297	1	0.03
2R10.298	1	0.07
2R10.300	1	0.01
2R10.301	1	0.03
2R10.302	1	0.02
2R10.303	1	0.08
2R10.306	1	0.06
2R10.307	1	0.03
2R10.308	1	0.05
2R10.cut.6	1	2.76
2R10.cut.19	1	0.45
2R10.cut.30	1	0.07
2R10.cut.31	1	0.06
2R11.14	1	0.29
2R11.21	1	0.24
2R11.37	1	0.26
2R11.43	1	0.03
2R13.3	1	4.67
2R13.23	1	3.59
2R13.45	1	1.25
2R13.47	1	0.94
2R13.53	1	3.76
2R13.93	1	0.48
2R13.94	1	0.5
2R13.95	1	0.56
2R13.96	1	0.85
2R13.97	1	0.42
2R13.101	1	0.25
2R13.102	1	0.15
2R13.103	1	0.04
2R13.104	1	0.08
2R1.4	2	13.71
2R1.26	2	0.77
2R1.31	2	0.5
2R2.6	2	0.96
2R2.16	2	1.13
2R2.36	2	0.22
2R2.45	2	0.04
2R2.47	2	0.06
2R2.52	2	0.24
2R2.55	2	0.15
2R2.58	2	0.05
2R2.61	2	0.06
2R2.65	2	0.06
2R2.68	2	0.65
2R3.11	2	0.02
2R3.21	2	1.65
2R4A.7	2	1.75
2R4A.21	2	0.4
2R4D.1	2	1.04
2R4.root.2	2	1.41
2R4.root.7	2	0.03
2R8_0-50cm.16	2	0.3
2R8_0-50cm.17	2	0.43
2R8_50-100cm.13	2	0.71
2R8_50-100cm.20	2	0.19
2R8_100-150cm.1	2	1.16
2R8_100-150cm.10	2	1.56
2R8_100-150cm.12	2	0.45
2R8_100-150cm.14	2	1.1
2R8_150-200cm.12	2	0.49
2R8_200-250cm.2	2	0.4
2R9.8	2	0.41
2R10.7	2	1.93
2R10.9	2	1.7
2R10.10	2	4.16
2R10.12	2	2.17
2R10.21	2	1.29
2R10.32	2	1.33
2R10.35	2	1.41
2R10.39	2	1.25
2R10.50	2	0.56
2R10.52	2	0.62
2R10.58	2	0.55
2R10.66	2	0.55
2R10.72	2	0.52
2R10.84	2	0.39
2R10.87	2	0.63
2R10.96	2	0.57
2R10.97	2	0.47
2R10.102	2	0.35
2R10.129	2	0.33
2R10.138	2	0.33
2R10.142	2	0.09
2R10.145	2	0.15
2R10.147	2	0.15
2R10.158	2	0.07
2R10.163	2	0.24
2R10.190.1	2	0.97
2R10.191	2	1.89
2R10.196	2	0.93
2R10.198	2	2.43
2R10.215	2	0.82
2R10.218	2	1.8
2R10.227	2	0.64
2R10.230	2	0.44
2R10.232	2	0.54
2R10.236	2	0.36
2R10.243	2	0.37
2R10.273	2	0.37
2R10.281	2	0.31
2R10.285	2	0.07
2R10.286	2	0.42
2R10.287	2	0.1
2R10.289	2	0.11
2R10.305	2	0.22
2R2.10	3	0.66
2R2.14	3	1.03
2R2.49	3	0.12
2R3.32	3	0.2
2R4A.4	3	8.85
2R4A.6	3	1.15
2R4.root.1	3	11.21
2R7.2	3	1.35
2R8_0-50cm.5	3	0.68
2R8_0-50cm.9	3	0.86
2R8_0-50cm.14	3	0.38
2R8_100-150cm.5	3	2.28
2R8_100-150cm.7	3	2.9
2R8_100-150cm.23	3	0.84
2R8_150-200cm.4	3	0.45
2R8_150-200cm.7	3	0.32
2R8_150-200cm.9	3	1.36
2R9.2	3	0.46
2R9.3.1	3	0.62
2R10.26	3	1.12
2R10.33	3	0.9
2R10.41	3	0.59
2R10.44	3	0.71
2R10.67	3	1.38
2R10.68	3	0.75
2R10.76	3	0.39
2R10.95	3	0.26
2R10.99	3	0.44
2R10.114	3	0.45
2R10.137	3	0.23
2R10.139	3	0.22
2R10.140	3	0.21
2R10.144	3	0.35
2R10.162	3	0.24
2R10.188	3	3.25
2R10.192	3	1.16
2R10.204	3	4.69
2R10.250	3	0.44
2R10.266	3	0.43
2R10.267	3	0.25
2R10.279	3	0.25
2R10.cut.4	3	2.67
2R10.cut.11	3	1.06
2R10.cut.14	3	0.34
2R10.cut.15	3	0.68
2R10.cut.23	3	0.18
2R13.40	3	0.86
2R1.8	4	21.56
2R1.T7	4	1.13
2R1.T11	4	3.66
2R2.9	4	0.64
2R2.17	4	0.66
2R2.20	4	0.27
2R2.30	4	0.14
2R2.40	4	0.07
2R2.60	4	0.1
2R3.20	4	0.11
2R3.22	4	0.1
2R3.31	4	0.35
2R4A.27	4	0.15
2R8_50-100cm.6	4	1.28
2R8_50-100cm.25	4	0.14
2R8_100-150cm.22	4	0.66
2R10.11	4	2.99
2R10.25	4	1.67
2R10.51	4	1.05
2R10.83	4	0.69
2R10.89	4	0.46
2R10.150	4	0.18
2R10.199	4	1.28
2R10.249	4	0.44
2R10.cut.5	4	3.49
2R10.cut.8	4	1.77
2R10.cut.13	4	1.08
2R10.cut.21	4	0.59
2R1.11	5	5.05
2R2.12	5	0.43
2R2.62	5	0.1
2R4A.3	5	4.97
2R4B.2	5	2.7
2R4D.8	5	0.94
2R9.16	5	0.34
2R10.4	5	5.88
2R10.30	5	0.96
2R10.31	5	1.2
2R10.36	5	1.04
2R10.42	5	1.74
2R10.104	5	0.32
2R10.146	5	0.16
2R10.244	5	0.35
2R13.59	5	0.82
2R2.3	6	1.32
2R2.8	6	2.83
2R2.32	6	0.14
2R2.54	6	0.12
2R2.59	6	0.12
2R4A.20	6	0.48
2R4_Trunk.2	6	17.87
2R4_offspring stem.2	6	2.24
2R8_100-150cm.30	6	0.49
2R10.28	6	1.27
2R10.69	6	0.53
2R10.103	6	0.42
2R10.125	6	0.35
2R10.160	6	0.19
2R10.201	6	0.82
2R10.cut.18	6	0.36
2R1.33	7	0.97
2R2.18	7	0.67
2R2.27	7	3.2
2R2.72	7	5.45
2R8_100-150cm.11	7	0.54
2R10.5	7	5.44
2R10.43	7	0.58
2R10.189	7	3.92
2R10.213	7	1.68
2R10.214	7	1.02
2R1.1	8	106.4
2R2.7	8	1.52
2R2.13	8	0.45
2R2.29	8	0.45
2R4.7	8	3.73
2R9.14	8	0.26
2R10.22	8	2.49
2R2.43	9	0.08
2R3.29	9	1.25
2R10.34	9	1.22
2R2.67	10	1.5
2R2.71	10	1.65
2R8_100-150cm.13	10	4.94
2R10.6	10	5.47
2R2.4	11	0.5
2R2.21	11	2
2R2.70	11	0.42
2R8_50-100cm.21	11	0.99
2R10.3	11	8.06
2R10.220	11	0.62
2R10.cut.2	11	7.11
2R2.50	12	0.08
2R2.53	12	0.3
2R3.23	12	0.4
2R10.cut.7	12	1.6
2R1.5	14	12.65
2R2.5	14	2.24
2R10.63	14	0.4
2R2.38	15	0.22
2R10.186	16	4.79
2R10.cut.1	16	9.35
2R10.cut.3	16	7.2
2R2.2	17	1.14
2R2.41	18	0.23
2R1.2	19	42.05
2R2.19	19	1.64
2R10.94	19	0.54
2R10.1	23	5.5
2R2.34	24	0.35
2R10.60	24	0.84
2R2.24	26	4.4
2R3.26	27	3.64
2R2.42	30	0.11
2R10.182	30	19.14
2R2.11	32	5.69
2R2.15	35	1.93
2R2.23	36	9.54
2R2.51	38	0.26
2R1.3	54	27.2
2R2.26	59	5.14
2R2.66	60	0.75
2R10.184	77	34.62
2R2.25	93	4.19
2R10.183	98	34.61
2R2.37	108	0.22
2R10.8	?	2R10.34

## Sheet: RNC
NEW CALEDONIA
N. piece from the field	Arthropod inclusions	Resin in grams
AL2.1	0	65.69
AL2.2	0	8.67
AL2.3	0	10.38
AL2.4	0	6.43
AL2.5	0	5.04
AL2.6	0	0.66
AL2.7	0	0.27
AL2.8	0	0.11
AL2.9	0	0.13
AL2.10	0	0.15
AL2.11	0	0.08
NC S3.1	0	82.16
NC S3.2	0	57.77
NC S3.3	0	62.48
NC S3.4	0	41.55
NC S3.5	0	34.8
NC S3.6	0	22.94
NC S3.7	0	24.44
NC S3.8	0	20.95
NC S3.9	0	16.04
NC S3.10	1	29.06
NC S3.11	0	16.35
NC S3.12	0	13
NC S3.13	0	11.32
NC S3.14	0	30.47
NC S3.15	0	21.78
NC S3.16	0	14.32
NC S3.17	0	16.69
NC S3.18	0	13.71
NC S3.19	0	24.02
NC S3.20	0	10.82
NC S3.21	0	14.67
NC S3.22	1	11.25
NC S3.23	0	13.6
NC S3.24	1	5.62
NC S3.25	0	7.7
NC S3.26	0	7.82
NC S3.27	0	3.37
NC S3.28	0	5.22
NC S3.29	0	3.7
NC S3.30	4	4.64
NC S3.31	0	20.5
NC S3.32	0	4.77
NC S3.33	0	3.32
NC S3.34	0	3.1
NC S3.35	0	2.62
NC S3.36	0	47.81
NC S3.37	0	27.92
NC S3.38	0	22.15
NC S3.39	0	8.8
NC S3.40	0	47.35
NC S3.41	0	1.65
NC S3.42	0	1.47
NC S3.43	0	2.14
NC S3.44	0	1.15
NC S3.45	0	0.93
NC S3.46	1	1.32
NC S3.47	0	0.8
NC S3.48	0	0.86
NC S3.49	0	1.01
NC S3.50	0	0.74
NC S3.51	0	0.65
NC S3.52	0	0.73
NC S3.53	0	0.44
NC S3.54	0	0.22
NC S3.55	0	0.18
NC S3.56	0	0.2
CY 19.1	0	38.35
CY 19.2.1	1	48.9
CY 19.3	0	46.95
CY 19.4	0	11.97
CY 19.5	0	0.46
CY 22.1	0	24.08
CY 22.2	0	16.32
CY 22.3	0	4.79
CY 22.4	0	13.26
CY 22.5	0	9.62
CY 22.6	0	2.7
CY 22.7	0	0.92
CY 22.8	0	0.21
CY 24.1	1	14.57
CY 24.2	1	18.68
CY 24.3	15	19.22
CY 24.4	0	12.2
CY28.1	1	28.24
CY28.2	0	21.43
CY28.3	0	12.89
CY28.4	1	15.78
CY28.5	1	13.27
CY28.6	0	8.03
CY28.7	0	11.03
CY28.8	2	7.7
CY28.9	0	8.33
CY28.10	0	4.15
CY28.11	0	6.51
CY28.12	0	3.3
CY28.13	0	1.69
CY28.14	0	1.8
CY28.15	0	2.5
CY28.16	0	1.57
CY28.17	0	1.94
CY28.18	0	1.41
CY28.19	0	1.54
CY28.20	0	1.09
CY28.21	0	1.37
CY28.22	0	1.07
CY28.23	0	1.09
CY28.24	0	0.5
CY28.25	0	0.27
CY28.26	0	0.35
CY28.27	0	0.27
CY28.28	0	0.25
CY28.29	0	0.21
CY28.30	0	0.23
CY28.31	0	0.25
CY34.1	0	16.89
CY34.2	0	6.19
CY34.3	0	3.12
CY 39.1	4	107.68
CY 39.2	0	21.69
CY 39.3	0	17.73
CY 39.4	0	5.6
CY 39.5	0	2.42
CY 39.6	0	1.46
CY 39.7	0	1.24
CY 39.8	0	0.75
CY 39.9	0	0.56
CY 39.10	0	0.8
CY 39.11	0	0.52
CY 39.12	0	0.28
CY 39.13	0	0.5
CY 39.14	0	0.43
CY 39.15	0	0.35
CY 39.16	0	0.34
CY 39.17	0	0.33
CY 39.18	0	0.26
CY 39.19	0	0.34
CY 39.20	0	0.6
CY 39.21	0	0.48
CY 39.22	0	0.4
CY 39.23	0	0.22
CY39.soil.1	0	43.19
CY39.soil.2	0	16.12
CY39.soil.3	0	1.46
CY39.soil.4	0	2.65
CY39.soil.5	0	3.3
CY39.soil.6	0	2.15
CY39.soil.7	0	1.5
CY39.soil.8	0	1.68
CY39.soil.9	0	2.04
CY39.soil.10	0	0.86
CY39.soil.11	0	1.45
CY39.soil.12	0	0.98
CY39.soil.13	0	1.4
CY39.soil.14	0	1.07
CY39.soil.15	0	1.1
CY39.soil.16	0	0.8
CY39.soil.17	0	0.93
CY39.soil.18	0	0.5
CY39.soil.19	0	0.32
CY39.soil.20	0	0.36
CY39.soil.21	0	0.6
CY39.soil.22	0	0.63
CY39.soil.23	0	0.65
CY39.soil.24	0	0.55
CY39.soil.25	0	0.44
CY39.soil.26	0	0.59
CY39.soil.27	0	0.33

## Sheet: Grams-artropod inclusions
	Resin producing tree	resin grams	N. of arthropod inclusions	Locality	Locality acronim	Reference
Cenozoic	Hymenaea	800.5	1743	Defaunation resin collected from Hymenaea in 2013 in Madagascar	R1MG	own data
	Hymenaea	1500	2141	Defaunation resin collected from Hymenaea in 2015 in Madagascar	R2MG	own data
	Hymenaea	1875.21	319	Copal/Defaunation resin collected in 2019 in Cotuí Dominican Republic	CCDO	own data
	Hymenaea	1678.78	270	Amber from El Valle, Dominican Republic	AEVDO	own data
	Hymenaea	523.45	140	Amber from San Rafael, Dominican Republic	ASRDO	own data
	Hymenaea	2000	107	Amber from Totolapa, Mexico	ATMX	(Solórzano-Kraemer et al., 2015)
	Agathis	942.7	8	Defaunation resin collected from Agathis in 2016 in New Caledonia	RNC	own data
	Agathis	721.7	27	Defaunation resin collected from Agathis in 2016 in New Caledonia	RNC	own data
	Agathis	909.1	13	Defaunation resin collected from Agathis in 2016 in New Caledonia	RNC	own data
	Agathis	1500	78	Amber from Southland region of the South Island, and Otago, New Zealand	ANZ	(Alexander Schmidt, per. comm., February 2023)
	Agathis	2000	47	Amber from Anglesea Coal Measures, Australia	AAAU	(Stilwell et al., 2020 and own data)
	Agathis	1500	2	Amber Australia	AMAU	(Stilwell et al., 2020 and own data)
Mesozoic	Agathis-like	139500	3346	Amber form Peñacerrada I, Spain	APES	own data
	Agathis-like	19937	1600	Amber from El Soplao, Spain	ASES	own data
	Agathis-like	12900	387	Amber from San Just, Spain	ASJES	own data
	Agathis-like	5500	11	Amber from La Hoya, Spain	AHES	own data
	Agathis-like	7000	14	Amber from La Rodada, Spain	ARES	(Peñalver et al., 2018 and own data)
	Agathis-like	500	2	Amber from Arroyo de la Pascueta, Spain	AAPES	own data
	Agathis-like	1128	100	Amber from Ariño, Spain	AAES	own data
	Agathis-like	40000	1330	Amber from Archingeay-Les Nouillers, France	AAFR	(Perrichot et al., 2007 and own data)
	Agathis-like	3000	113	Amber from La Buzinie, France	ABFR	own data
	Agathis-like	500	6	Amber from Fouras, France	AFFR	own data
	Agathis-like	300	4	Amber from Cadeuil, France	ACFR	(Perrichot, 2005 and own data)
	Agathis-like	8000	98	Amber from Aix island, France	AAIFR	own data
	Agathis-like	6000	149	Amber from Fourtou, France	AFFR	own data
	Agathis-like	2000	40	Amber from Renardières, France	ARFR	(Perrichot, 2005 and own data)
	Agathis-like	400	27	Amber from Salignac, France	ASFR	own data
	Agathis-like	2550	47	Amber from Doumanga, Congo	ADCO	(Bouju & Perrichot, 2020 and own data)
